# Supplementary material
Source: MDPI journal article supplement (https://www.mdpi.com/2073-4441/13/9/1261)
Supplement: s1 [file s1]

# Utilization of a Regional Dew Formation Model in Kenya

Atashi et al.

**Table S1:** Dew yield from plane radiative condensers in various field campaigns and models.

| Sampling site               | Dew events | Study period               | Mean volume [L/m <sup>2</sup> /day] | Max volume [L/m <sup>2</sup> / day] | Observed/ Modeled | Reference                           |
|-----------------------------|------------|----------------------------|-------------------------------------|-------------------------------------|-------------------|-------------------------------------|
| Fayetteville, AR (USA)      | 107        | Jul 1989–July 1990         | 0.15                                | -                                   | Obs               | Wagner et al. (1992)                |
| Dodoma (Tanzania)           | -          | 30 nights                  | 0.04                                | -                                   | Obs               | Nilsson (1994)                      |
| Kungsbacka (Sweden)         | 11         | 14 Aug–01 Sept 1993        | 0.145                               | 0.21                                | Obs               | Nilsson, (1996)                     |
| Dodoma (Tanzania)           | 21         | Nov 1993                   | 0.057                               | 0.08                                | Obs               | Nilsson, (1996)                     |
| Dodoma (Tanzania)           | 147        | 25 Aug 1994–4 Feb 1995     | 0.05                                | 0.24                                | Obs/Mod           | Vargas et al. (1998)                |
| Sde Boqer (Israel)          | 34         | Aug–Nov 1992               | 0.2/dew&fog                         | -                                   | Obs               | Kidron (1999)                       |
| Har Harif (Israel)          | 21         | Aug–Nov 1992               | 0.3/dew&fog                         | -                                   | Obs               | Kidron (1999)                       |
| Dayalbagh (India)           | -          | 15 Dec–15 Feb              | 0.59                                | 1.38                                | Obs               | Khare et al. (2000)                 |
| Ajaccio (France)            | 214        | 22 July 2000–11 Sept 2001  | 0.12                                | 0.38                                | Obs               | Muselli et al. (2002)               |
| Osaka (Japan)               | 16         | No info                    | 0.14                                | -                                   | Obs               | Takenaka et al. (2003)              |
| Grenonle (France)           | 109        | 25 Nov1999– 23 Jan 2001    | 0.036                               | -                                   | Obs               | Beysens et al. (2003)               |
| Zadar (Croatia)             | 87         | 21 July 2003–31 May 2004   | 0.15                                | -                                   | Obs               | Mileta et al. (2004)                |
| Jerusalem (Israel)          | 176        | 01 June 2003–31 May 2004   | 0.188                               | ~ 0.50                              | Obs               | Berkowicz et al. (2004)             |
| Komiz'a (Croatia)           | 76         | 24 June 2003–26 April 2004 | 0.08                                | -                                   | Obs               | Mileta et al. (2004)                |
| Bordeaux (France)           | 211        | 14 Aug 1999–23 Jan 2001    | 0.046                               | -                                   | Obs/Mod           | Beysens et al. (2005)               |
| Dhahran (Saudi Arabia)      | -          |                            | 0.22                                | -                                   | Obs/Mod           | Gandhisan and Abualhamayel (2005)   |
| Brive-la-Gaillarde (France) | 275        | 01 Jan–31 Dec 2000         | 0.115                               | <0.475                              | Obs               | Beysens et al. (2006a)              |
| Ajaccio (France)            | -          | 10 Dec 2001–10 Dec 2003    | ~ 0.106                             | ~ 0.332                             | Obs               | Muselli et al. (2006a)              |
| Bordeaux (France)           | 110        | 15 Jan 2002–14 Jan 2003    | -                                   | ~ 0.22                              | Obs               | Beysens et al. (2006b)              |
| Jerusalem (Israel)          | 554        | 2003–2006                  | 0.199                               | ~ 0.60                              | Obs               | Berkowicz et al. (2007)             |
| Kothara (India)             | -          | 01 Oct 2004–31 May 2005    | 0.098                               | 0.24                                | Obs               | Sharan et al. (2007)                |
| Central Netherlands         | -          | Dec 2003–May 2005          | 0.10                                | -                                   | Obs               | Jacobs et al. (2008)                |
| Tahiti                      | 151        | 16 May–14 Oct 2005         | 0.068                               | 0.22                                | Obs               | Clus et al. (2008)                  |
| Tikehau                     | 109        | 21 June–07 Oct 2005        | 0.102                               | 0.23                                | Obs               | Clus et al. (2008)                  |
| Komiz'a (Croatia)           | 263        | 07 Jan 2003–31 Oct 2006    | 0.108                               | 0.592                               | Obs               | Muselli et al. (2009)               |
| Zadar (Croatia)             | 484        | 07 Jan 2003–31 Oct 2006    | 0.138                               | 0.406                               | Obs               | Muselli et al. (2009)               |
| South–West Morocco          | 178        | 01 May 2007–30 April 2008  | 0.106                               | -                                   | Obs               | Lekouch et al. (2010a)              |
| Wroclaw (Poland)            | 421        | 05 Oct 2007–07March 2010   | 0.103                               | 0.354                               | Obs               | Sobik et al. (2010)                 |
| Sudetes (Poland)            | 55         | 21 June 2009–16 Jan 2010   | 0.190                               | 0.452                               | Obs               | Sobik et al. (2010)                 |
| Cartagena (Spain)           | 175        | May 2009–May 2010          | 0.105                               | -                                   | Obs               | Maestre-Valero et al. (2011)        |
| Panandhro (India)           | 69         | 07 Feb 2004–25Feb 2006     | 0.189                               | -                                   | Obs               | Sharan et al. (2011)                |
| Mirleft (Morocco)           | 178        | 01 May 2007–30 April 2008  | 0.106                               | -                                   | Obs/Mod           | Lekouch et al. (2012)               |
| Id Ouasskssou (Morocco)     | 187        | 01 May 2007–30 April 2008  | 0.202                               | -                                   | Obs               | Lekouch et al. (2012)               |
| Wroclaw (Poland)            | 19         | April–Sep 2009             | 0.179                               | -                                   | Obs               | Galek et al. (2012)                 |
| Sde Boqer (Israel)          | 29         | during the fall of 1992    | 0.21                                | -                                   | Obs               | Kidron & Starinsky (2012)           |
| Idouasskssou (Morocco)      | 137        | 15 Dec 2008–31 July 2009   | 0.158                               | -                                   | Obs               | Clus et al. (2013)                  |
| Adelaide Hills (Australia)  | 14         | 24 April–23 May 2009       | 0.225                               | -                                   | Obs/Mod           | Guan et al. (2014)                  |
| Mexico City (Mexico)        | -          | 22 Dec 201–21 Mar 2012     | 0.0317                              | -                                   | Obs               | Arias-Torres & Flores-Prieto (2015) |
| Krakow (Poland)             | 79         | May–Oct 2009               | 0.11                                | -                                   | Obs               | Muskala et al. (2015)               |
| Gaik-Brzezowa (Poland)      | 80         | May–Oct 2009               | 0.19                                | -                                   | Obs               | Muskala et al. (2015)               |
| Developed in Finland        | -          | -                          | -                                   | -                                   | Glob Mod          | Vuollekoski et al. (2015)           |
| Developed in France         | -          | -                          | -                                   | -                                   | Glob Mod          | Beysens (2016)                      |
| Paris (France)              | 63         | April 2011–Mar 2012        | 0.055                               | -                                   | Obs               | Beysens et al. (2017)               |
| Beiteddine (Lebanon)        | 123        | 2013–2014 growing seasons  | 0.13                                | 0.46                                | Obs               | Tomaszkiewicz et al. (2017)         |
| Maktau (Kenya)              | 262        | April 2016–Mar 2017        | 0.067/OPUR                          | > 0.2 mm                            | Obs/Mod           | Tuure et al. (2019)                 |

### S.1. Detailed Model description

The original model setup was made suitable for a global context; i.e. it included polar regions. Therefore, it included the water phase change between liquid and solid; i.e. vapour-to-liquid (condensation) and vapour-to-solid (desublimation). This was not changed in our modified version of the model for Iran because we presume desublimation might happen in some regions of Iran (e.g. in the mountain regions or north Iran). We also did not change the type and condition of the condenser material; it was assumed a horizontally aligned sheet of a suitable material such as low-density polyethylene (LDPE) or polymethylmethacrylate (PMMA). The condenser sheet was also assumed to be at 2 meters from the ground and thermally insulated from the ground.

$$\frac{dT_c}{dt} (C_c m_c + C_w m_w + C_i m_i) = P_{rad} + P_{cond} + P_{conv} + P_{lat} \quad (1)$$

The model was setup so that it assumes similar conditions for the phase-change of pre-existing water or ice on the condenser sheet. For instance, if the water on the condenser is in liquid phase (i.e.  $m_w > 0$ ) and the condenser temperature  $T_c < 0$  °C, then the sheet is losing energy (i.e. the right-hand side of Eq. (1) is negative). In that case, instead of solving Eq. (1),  $T_c$  is assumed to be constant and the lost mass from the liquid phase of water is transferred to the cumulated mass of ice; i.e. the water is transformed from liquid phase to solid phase. Consequently, Eq. (1) is replaced by

$$L_{wi} \frac{dm_w}{dt} = P_{rad} + P_{conv} + P_{lat}, \quad (2)$$

where  $L_{wi}$  is the latent heat of fusion. If the water on the condenser is in solid phase (i.e.  $m_i > 0$ ) and the condenser temperature  $T_c > 0$  °C, a similar equation is assumed for the change rate of ice mass ( $m_i$ ).

Note that Eq. (2) is not related to the condensation of water; it only describes the phase change of the already condensed water or ice on the condenser. For the water condensation rate, which is assumed independent of Eq. (2), the mass-balance equation is then assumed as

$$\frac{dm}{dt} = \max[0, S_c k (P_{sat}(T_d) - P_c(T_c))], \quad (3)$$

where  $m$  represents either the mass of ice ( $m_i$ ) or water ( $m_w$ ) depending on whether  $T_c$  is below or above 0 °C.  $P_{sat}(T_d)$  is the saturation pressure at the dew point temperature and  $P_c(T_c)$  is the vapor pressure over the condenser sheet.  $k = h / L_{vw} \gamma = 0.622h / C_a p$  is the mass transfer coefficient, where  $L_{vw}$  is the specific latent heat of water vaporization,  $\gamma$  is the psychrometric constant,  $C_a$  is the specific heat capacity of air, and  $p$  is the atmospheric air pressure. Here,  $h = 5.9 + 4.1 u (511 + 294) / (511 + T_a)$  is the heat transfer coefficient, where  $u$  and  $T_a$  are the prevailing horizontal wind speed and the ambient temperature at 2 meters from the ground.

In practice, the wettability of the surface affects the vapor pressure  $P_c$  directly above it. In other words,  $P_c$  is lower over a wet surface; and thus, condensation may take place even if  $T_c > T_d$ . It is also assumed that the processes included in Eq. (3) undergo irreversible condensation; i.e. there is no evaporation or sublimation during daytime even if  $T_c > T_a$ . Furthermore, the model simulation resets the cumulative values for water and ice condensation at noon and takes the preceding maximum value of  $m_w + m_i$  as the representative daily yield. This way, the model simulation replicates the daily manual dew water collection of the condensed water around sunrise; i.e. after which  $T_c$  is often above the dew point temperature. All terms and nomenclature are described in more details in Table S1 and Table S2.

The model output is dew formation yield given in liters of water collected on a 1 m<sup>2</sup> condenser sheet (i.e. L/m<sup>2</sup>). However, this can be converted to units of mm (i.e. equivalent to rainfall). The model input parameters include: horizontal and vertical wind components at 2 meters, surface roughness ( $z_0$ ), ambient temperature and dew point ( $T_a$  and  $D_p$ ) at 2 meters,

short-wave and long-wave surface solar radiation ( $R_{sw}$  and  $R_{lw}$ )

As we mentioned in the method section of manuscript and according to the ECMWF ERA-INTRIM data-base, the horizontal wind components ( $U_{10}$  and  $V_{10}$ ) are provided at 10 meters. Therefore, the wind speed at 2 meters was calculated by using a logarithmic wind profile

$$WS = \frac{\log\left(\frac{2+z_0}{z_0}\right)}{\log\left(\frac{10+z_0}{z_0}\right)} \sqrt{U_{10}^2 + V_{10}^2}, \quad (4)$$

where  $z_0$  is the surface roughness and  $U_{10}$  and  $V_{10}$  are the horizontal wind speed components at 10 meters. It is important to understand that Eq. (4) is valid during certain conditions. For instance, in stable conditions (such as at night) Eq. (4) it overestimates the wind speed at 2 meters whereas in unstable conditions it underestimates the wind speed at 2 meters.

According to the ECMWF ERA-INTRIM data-base,  $z_0$  is obtained as an instantaneous forecast parameter whereas  $R_{sw}$  and  $R_{lw}$  are accumulated forecasted fields. The mean  $R_{sw}$  and  $R_{lw}$  in a time interval is obtained by taking the difference of the accumulated values between the corresponding time steps divided by the time difference in seconds. The result is a mean value for that time interval 00:00 or 12:00. All input parameters had a horizontal resolution 0.25 degree (approximately 30 km).

**Table S2:** Description of the dew formation model by listing the terms in Eq. (1).

| <b>Term</b> | <b>Unit</b>        | <b>Description</b>                                                                                                                                                                                                                                                                                                                                                                                                                                                                                                                                                                                                                                                                                                                                                                                  |
|-------------|--------------------|-----------------------------------------------------------------------------------------------------------------------------------------------------------------------------------------------------------------------------------------------------------------------------------------------------------------------------------------------------------------------------------------------------------------------------------------------------------------------------------------------------------------------------------------------------------------------------------------------------------------------------------------------------------------------------------------------------------------------------------------------------------------------------------------------------|
| $dT_c/dt$   | $K s^{-1}$         | Change rate of the condenser temperature                                                                                                                                                                                                                                                                                                                                                                                                                                                                                                                                                                                                                                                                                                                                                            |
| $T_c$       | K                  | Temperature of the condenser                                                                                                                                                                                                                                                                                                                                                                                                                                                                                                                                                                                                                                                                                                                                                                        |
| $t$         | s                  | Time. Here the time step in the model was 10 s                                                                                                                                                                                                                                                                                                                                                                                                                                                                                                                                                                                                                                                                                                                                                      |
| $C_c$       | $J kg^{-1} K^{-1}$ | Specific heat capacity of the condenser. For low-density polyethylene (LDPE) and polymethylmethacrylate (PMMA) it is $2300 J kg^{-1} K^{-1}$                                                                                                                                                                                                                                                                                                                                                                                                                                                                                                                                                                                                                                                        |
| $C_i$       | $J kg^{-1} K^{-1}$ | Specific heat capacity of ice ( $2110 J kg^{-1} K^{-1}$ )                                                                                                                                                                                                                                                                                                                                                                                                                                                                                                                                                                                                                                                                                                                                           |
| $C_w$       | $J kg^{-1} K^{-1}$ | Specific heat capacity of water ( $4181.3 J kg^{-1} K^{-1}$ )                                                                                                                                                                                                                                                                                                                                                                                                                                                                                                                                                                                                                                                                                                                                       |
| $m_c$       | kg                 | Mass of the condenser given by $m_c = \rho_c S_c \delta_c$ where $\rho_c$ , $S_c$ , and $\delta_c$ are the density (here it is $920 kg m^{-3}$ ), surface area (here it is $1 m^2$ ), and thickness of the condenser (here it is $0.39 mm$ )                                                                                                                                                                                                                                                                                                                                                                                                                                                                                                                                                        |
| $m_i$       | kg                 | Mass of ice                                                                                                                                                                                                                                                                                                                                                                                                                                                                                                                                                                                                                                                                                                                                                                                         |
| $m_w$       | kg                 | Mass of water, representing the cumulative mass of water that has                                                                                                                                                                                                                                                                                                                                                                                                                                                                                                                                                                                                                                                                                                                                   |
| $P_{rad}$   | W                  | Heat exchange due to incoming and outgoing radiation<br><br>$P_{rad} = (1 - a) S_c R_{sw} + \epsilon_c S_c R_{lw} - S_c \epsilon_c \sigma T_c^4$ <p>where <math>a</math> is the condenser short-wave albedo (here it is 0.84), <math>S_c</math> is the condenser surface area (here it is <math>1 m^2</math>), <math>\epsilon_c</math> is the emissivity of the condenser (here it is 0.94), <math>\sigma</math> is Stephan-Boltzmann constant (<math>5.67 \times 10^{-8} W m^{-2} K^{-4}</math>), <math>T_c</math> [K] is the temperature of the condenser, and <math>R_{sw}</math> and <math>R_{lw}</math> [<math>W m^{-2}</math>] are the incoming short-wave radiation (i.e. surface solar radiation downwards) and incoming long-wave radiation (i.e. surface thermal radiation downwards)</p> |
| $P_{cond}$  | W                  | Conductive heat exchange between the condenser surface and the ground. For simplicity, we assumed that the condenser is perfectly insulated from the ground; i.e. $P_{cond} = 0$                                                                                                                                                                                                                                                                                                                                                                                                                                                                                                                                                                                                                    |
| $P_{conv}$  | W                  | Convective heat exchange<br><br>$P_{conv} = S_c (T_a - T_c) h$ <p>where <math>S_c</math> is the condenser surface area (here it is <math>1 m^2</math>), <math>T_a</math> [K] is the ambient temperature at 2 meters from the ground, <math>T_c</math> [K] is the temperature of the condenser, and <math>h</math> [<math>W m^{-2} K^{-1}</math>] is the heat transfer coefficient that is estimated based on a semi-empirical equation (Richards, 2009)</p> $h = 5.9 + 4.1 WS (511 + 294) / (511 + T_a)$ <p>and here <math>WS</math> [<math>m s^{-1}</math>] is the prevailing horizontal wind speed at 2 meters from the ground.</p>                                                                                                                                                               |
| $P_{lat}$   | W                  | Latent heat released by the condensation or desublimation of water<br><br>$P_{lat} = \begin{cases} L_{vw} \frac{dm_w}{dt} & T_c > 0 ^\circ C \\ L_{vi} \frac{dm_i}{dt} & T_c < 0 ^\circ C \end{cases}$ <p>where <math>L_{vw}</math> [<math>J kg^{-1}</math>] is the specific latent heat of water vaporization and <math>L_{vi}</math> [<math>J kg^{-1}</math>] is specific latent heat of water desublimation. Here, <math>dm_w/dt</math> is the change rate of water whereas <math>dm_i/dt</math> is the change rate of ice</p>                                                                                                                                                                                                                                                                   |

**Table S3:** A list of nomenclature.

| <b><i>Parameter</i></b> | <b>Unit</b>                        | <b>Description</b>                                                    |
|-------------------------|------------------------------------|-----------------------------------------------------------------------|
| $\alpha$                | --                                 | Albedo of condenser sheet                                             |
| $C_a$                   | J kg <sup>-1</sup> K <sup>-1</sup> | Specific heat capacity of air                                         |
| $C_c$                   | J kg <sup>-1</sup> K <sup>-1</sup> | Specific heat capacity of the condenser                               |
| $C_i$                   | J kg <sup>-1</sup> K <sup>-1</sup> | Specific heat capacity of ice                                         |
| $C_w$                   | J kg <sup>-1</sup> K <sup>-1</sup> | Specific heat capacity of water                                       |
| $DP$                    | K                                  | Dew point temperature                                                 |
| $h$                     | W K <sup>-1</sup> m <sup>-2</sup>  | Heat transfer coefficient                                             |
| $k$                     | Per s <sup>-1</sup>                | Mass transfer coefficient                                             |
| $L_{vi}$                | J kg <sup>-1</sup>                 | Specific latent heat of desublimation for water                       |
| $L_{vw}$                | J kg <sup>-1</sup>                 | Specific latent heat of vaporization for water                        |
| $L_{wi}$                | J kg <sup>-1</sup>                 | Latent heat of fusion                                                 |
| $m_c$                   | kg                                 | Mass of the condenser                                                 |
| $m_i$                   | kg                                 | Mass of ice                                                           |
| $m_w$                   | kg                                 | Mass of water                                                         |
| $p$                     | Pa                                 | Atmospheric air pressure                                              |
| $p_c$                   | Pa                                 | Vapour pressure over condenser                                        |
| $p_{sat}$               | Pa                                 | Saturation pressure of water                                          |
| $P_{cond}$              | W                                  | Conductive heat exchange between the condenser surface and the ground |
| $P_{conv}$              | W                                  | Convective heat exchange                                              |
| $P_{lat}$               | W                                  | Latent heat released by the condensation or desublimation of water    |
| $P_{rad}$               | W                                  | Heat exchange due to incoming and outgoing radiation                  |
| $R_{lw}$                | W m <sup>2</sup>                   | Surface thermal radiation downwards                                   |
| $R_{sw}$                | W m <sup>2</sup>                   | Surface solar radiation downwards                                     |
| $S_c$                   | m <sup>2</sup>                     | Surface area of condenser                                             |
| $T_a$                   | K                                  | Ambient temperature at 2 meters                                       |
| $T_c$                   | K                                  | Temperature of the condenser                                          |
| $U_{10}$                | m s <sup>-1</sup>                  | Horizontal wind speed component at 10 meters                          |
| $V_{10}$                | m s <sup>-1</sup>                  | Horizontal wind speed component at 10 meters                          |
| $WS$                    | m s <sup>-1</sup>                  | Prevailing horizontal wind speed at 2 meters                          |
| $z_0$                   | m                                  | Surface roughness                                                     |
| $\delta_c$              | mm                                 | Condenser sheet thickness                                             |
| $\varepsilon_c$         | --                                 | Emissivity of condenser sheet                                         |
| $\gamma$                | Pa K <sup>-1</sup>                 | Psychrometric constant                                                |
| $\sigma$                | W m <sup>-2</sup> k <sup>-4</sup>  | Stefan-Boltzmann constant                                             |

## S.2. Seasonal variation of cumulative dew yield

Figure S1, shows the seasonal occurrence of dew with a threshold less than 0.1 mm/day as the smallest amount of water can be collected on condenser sheet.

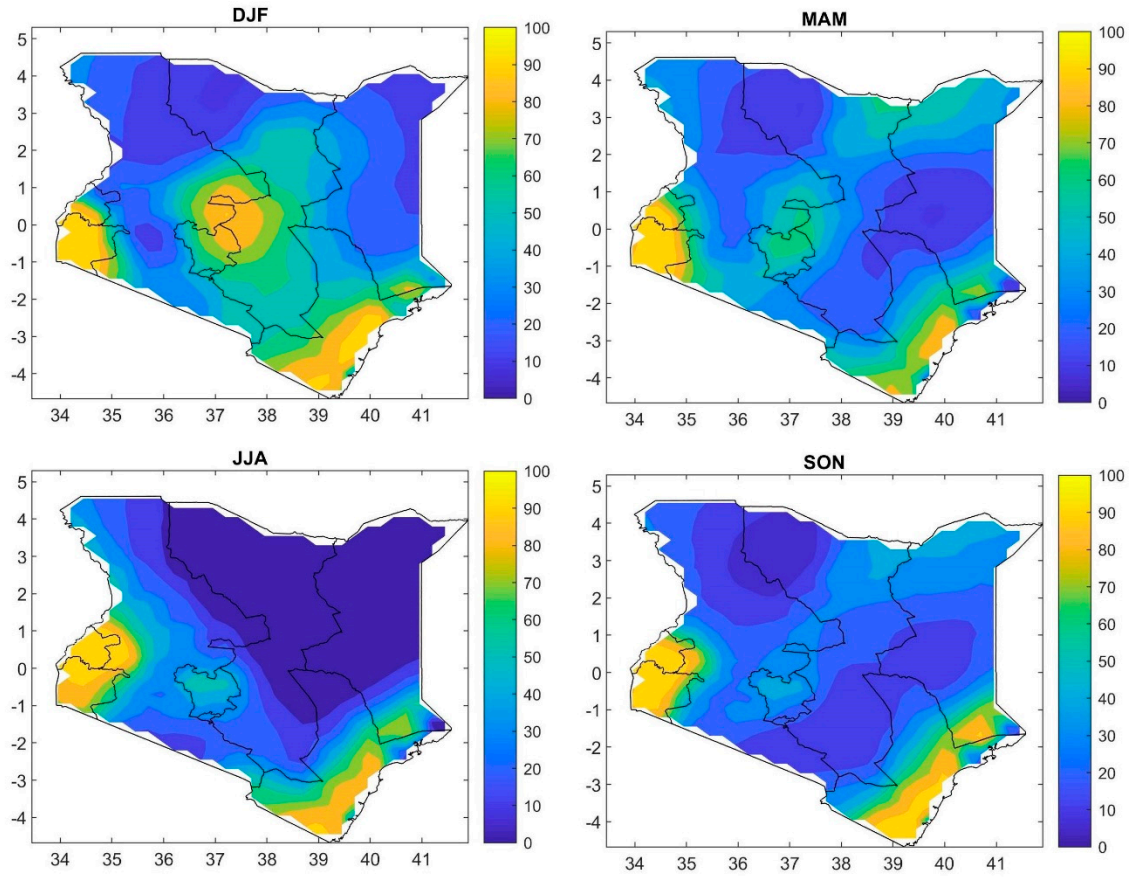

**Figure S1:** Spatial patterns for overall seasonal occurrence of dew formation days (with a threshold of 0.1 mm/day) represented by the percentage of the days per season during 1979–2018.

### S.3. seasonal variation of meteorological parameters

Figure S2\_S4 present the long-term mean seasonal variation of some key factors in dew formation (i.e., air temperature, dewpoint temperature, relative humidity, wind speed at 2-meter height and total cloud cover) in dew zone A, B and C respectively.

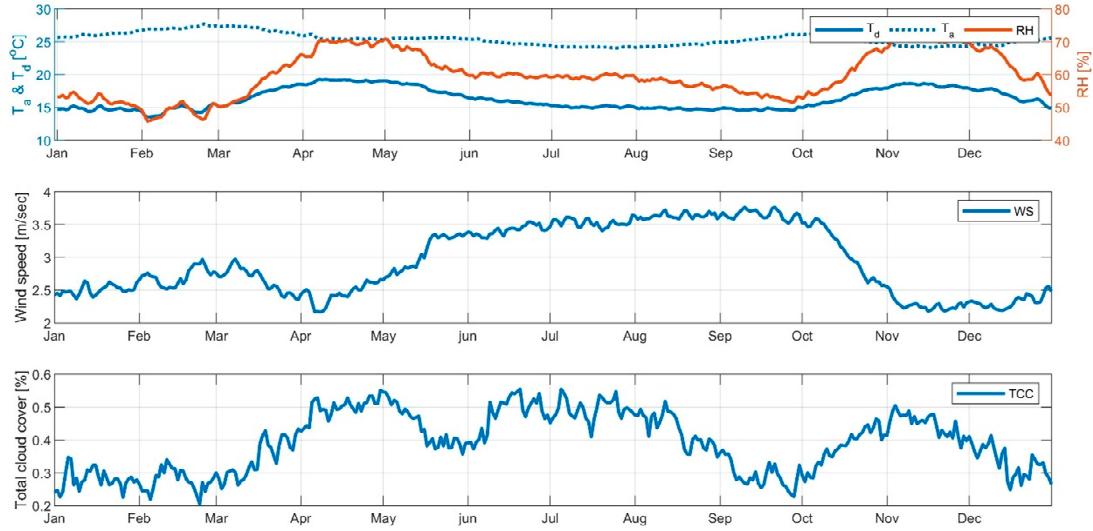

**Figure S2.** long-term mean seasonal variation in dew zone A. **a)** air temperature (point blue line), dewpoint temperature (solid blue line), relative humidity (red line), **b)** wind speed at 2 meter height (blue line) and **c)** total cloud cover (blue line).

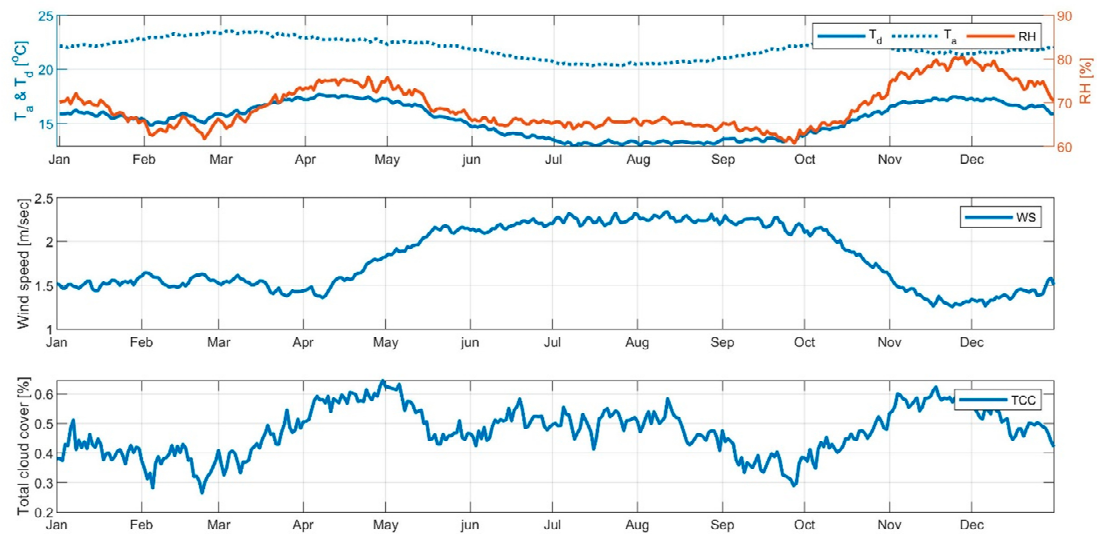

**Figure S3.** long-term mean seasonal variation in dew zone B **a)** air temperature (point blue line), dewpoint temperature (solid blue line), relative humidity (red line), **b)** wind speed at 2 meter height (blue line) and **c)** total cloud cover (blue line).

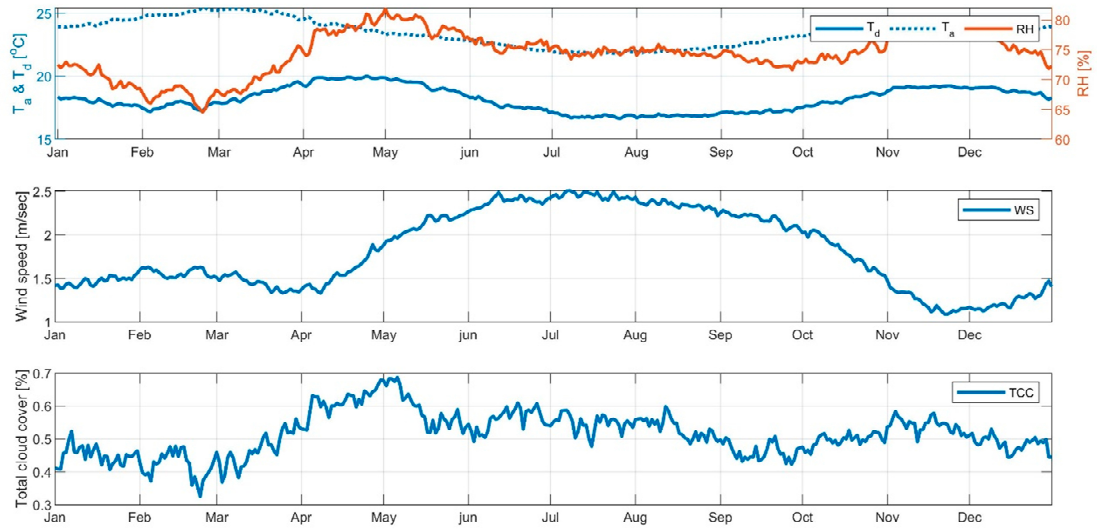

**Figure S4.** long-term mean seasonal variation in dew zone C **a)** air temperature (point blue line), dewpoint temperature (solid blue line), relative humidity (red line), **b)** wind speed at 2-meter height (blue line) and **c)** total cloud cover (blue line).

#### S.4. Dependency of dew yield on meteorological parameters

The correlation between dew yield and some of key meteorological factors in dew formation is presented in [Figure S5\\_S7](#) for each dew zone, respectively.

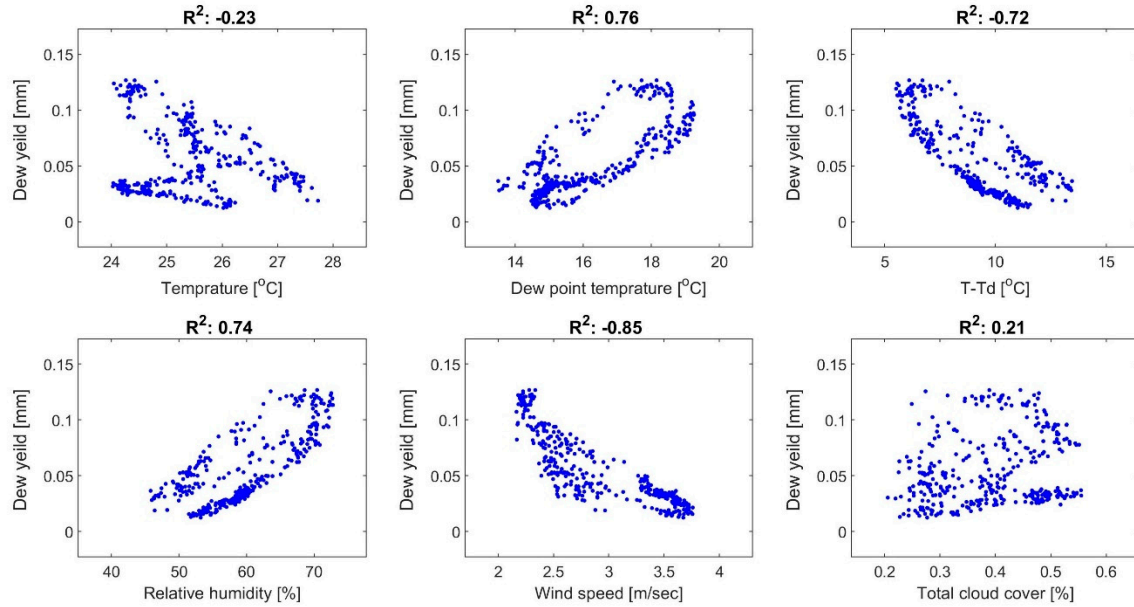

**Figure S5.** Correlation between dew yield (Y axis) and meteorological parameters (X axis) in dew zone A. **a)** Temperature, **b)** dewpoint temperature, **c)** difference between air temperature and dewpoint, **d)** relative humidity, **e)** wind speed at 2-meter height, and **f)** total cloud cover.

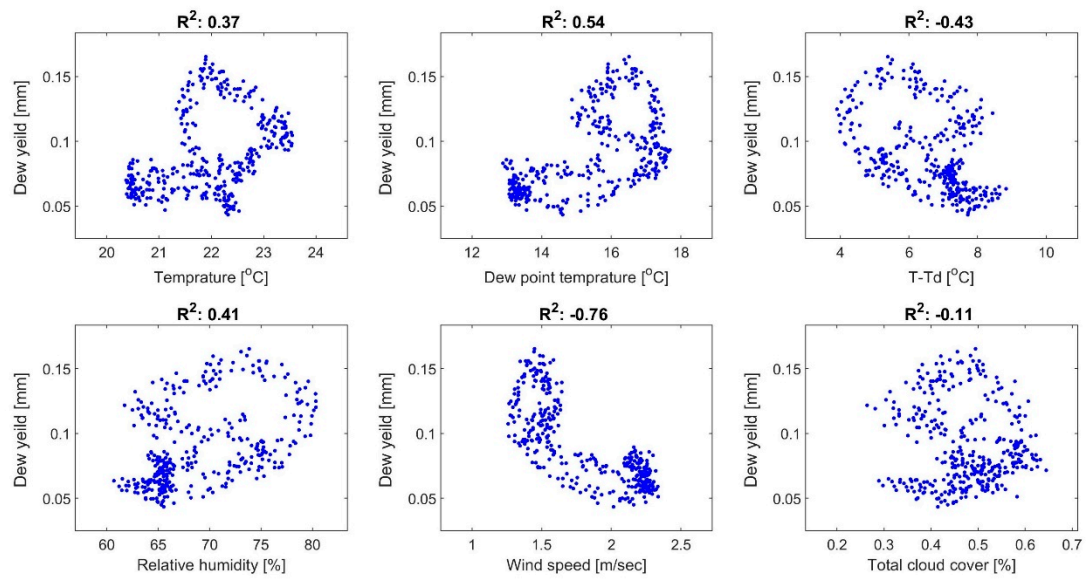

**Figure S6.** Correlation between dew yield (Y axis) and meteorological parameters (X axis) in dew zone B. **a)** Temperature, **b)** dewpoint temperature, **c)** difference between air temperature and dewpoint, **d)** relative humidity, **e)** wind speed at 2-meter height, and **f)** total cloud cover.

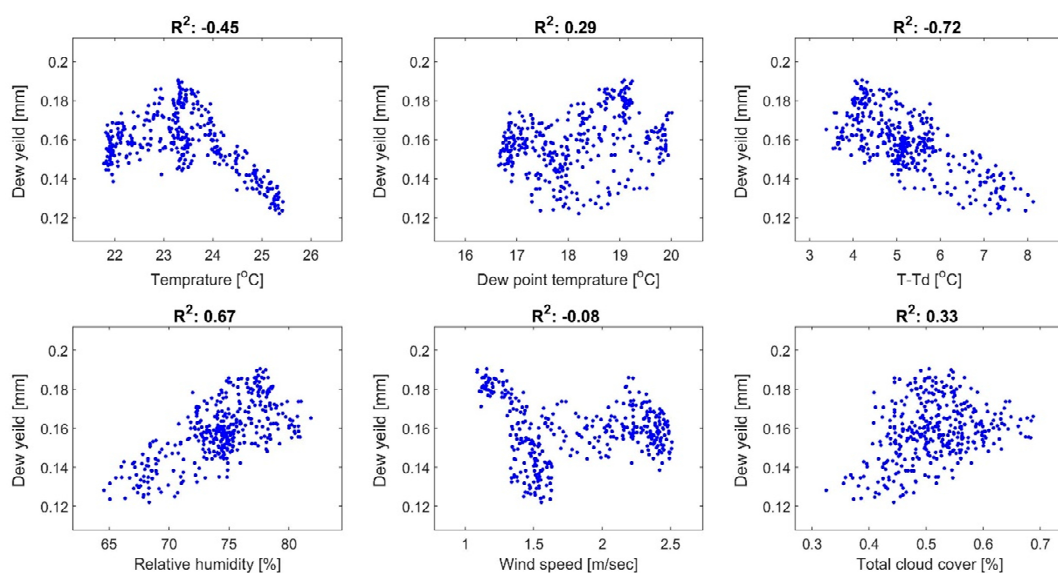

**Figure S7.** Correlation between dew yield (Y axis) and meteorological parameters (X axis) in dew zone C. **a)** Temperature, **b)** dewpoint temperature, **c)** difference between air temperature and dewpoint, **d)** relative humidity, **e)** wind speed at 2-meter height, and **f)** total cloud cover.

## References

- Arias-Torres, J.E., Flores-Prieto, J.J., 2016. Winter dew harvest in Mexico City. *Atmosphere*. 7(1), 2.
- Berkowicz, S., Beysens, D. N., Milimouk, I., Heusinkveld, B., Muselli, M., Jacobs, A., Clus, O., 2007. Urban dew collection in Jerusalem: A three-year analysis. *Proceedings of the 4th Conference on Fog, Fog Collection and Dew*, Cape Town, South Africa.
- Beysens, D., 2016. Estimating dew yield worldwide from a few meteo data. *Atmospheric research*. 167, 146-155.
- Beysens, D., Milimouk, I., Nikolayev, V., Muselli, M., Marcillat, J., 2003. Using radiative cooling to condense atmospheric vapor: A study to improve water yield. *Journal of Hydrology*. 276 (1), 1-632 11.
- Beysens, D., Mongruel, A., Acker, K., 2017. Urban dew and rain in Paris, France: Occurrence and physico-chemical characteristics. *Atmospheric Research*. 189, 152-161.
- Beysens, D., Muselli, M., Milimouk, I., Ohayon, C., Berkowicz, S. M., Soyeux, E., Mileta, M Ortega, P., 2006. Application of passive radiative cooling for dew condensation. *Energy*. 31(13), 2303-2315.
- Beysens, D., Muselli, M., Nikolayev, V., Narhe, R., Milimouk, I., 2005. Measurement and modelling of dew in island, coastal and alpine areas. *Atmospheric Research*. 73(1), 1-22.
- Beysens, D., Ohayon, C., Muselli, M., Clus, O., 2006. Chemical and biological characteristics of dew and rain water in an urban coastal area (Bordeaux, France). *Atmospheric Environment*. 40(20), 3710-3723.
- Burlando, M., 2009. The synoptic-scale surface wind climate regimes of the Mediterranean Sea according to the cluster analysis of ERA-40 wind fields. *Theoretical and applied climatology*. 96(1-2), 69-83.
- Clus, O., Lekouch, I., Muselli, M., Milimouk-Melnitshouk, I., Beysens, D., 2013. Dew fog and rain water collectors in a village of S-Morocco (Idouassksou). *Desalination and Water Treatment*. 51, 4235 – 4238.
- Clus, O., Ortega, P., Muselli, M., Milimouk, I., Beysens, D., 2008. Study of dew water collection in humid tropical islands. *Journal of Hydrology*. 361, 159 – 171.
- Gałek, G., Sobik, M., Błaś, M., Polkowska, Ż., Cichała-Kamrowska, K., 2012. Dew formation and chemistry near a motorway in Poland. *Pure and Applied Geophysics*. 169(5-6), 1053-1066.
- Gandhisani, P., Abualhamayel, H.I., 2005. Modelling and testing of a dew collection system. *Desalination*. 18, 47 – 51.
- Guan, H., Sebben, M., Bennett, J., 2014. Radiative-and artificial-cooling enhanced dew collection in a coastal area of South Australia. *Urban Water Journal*. 11(3), 175-184.
- Jacobs, A. F. G., Heusinkveld, B. G., Berkowicz, S. M., 2008. Passive dew collection in a grassland area, The Netherlands. *Atmospheric Research*. 87, 377–385.
- Khare, P., Singh, S. P., Maharaj Kumari, K., Kumar, A., Srivastava, S. S., 2000. Characterization of organic acids in dew collected on surrogate surfaces. *Journal of Atmospheric Chemistry*. 37(3), 231-244.
- Kidron, G. J., 1999. Altitude dependent dew and fog in the Negev Desert, Israel. *Agricultural and Forest Meteorology*. 96, 1-8.
- Kidron, G. J., Starinsky, A., 2012. Chemical composition of dew and rain in an extreme desert (Negev): Cobbles serve as sink for nutrients. *Journal of Hydrology*. 420, 284-291.
- Lekouch, I., Kabbachi, B., Milimouk-Melnitshouk, I., Muselli, M., Beysens, D., 2010. Influence of temporal variations and climatic conditions on the physical and chemical characteristics of dew and rain in South-West Morocco. *5th International Conference on Fog, Fog Collection and Dew*, Münster, Germany, 25-30.
- Lekouch, I., Lekouch, K., Muselli, M., Mongruel, A., Kabbachi, B., Beysens, D., 2012. Rooftop dew, fog and rain collection in southwest Morocco and predictive dew modeling using neural networks. *Journal of Hydrology*. 448, 60-72.
- Maestre-Valero, J. F., Martínez-Alvarez, V., Baille, A., Martín-Górriz, B., Gallego-Elvira, B., 2011. Comparative analysis of two polyethylene foil materials for dew harvesting in a semi-arid climate. *Journal of Hydrology*. 410, 84–91.
- Mileta, M., Muselli, M., Beysens, D., Berkowicz, S. M., Heusinkveld, B. G., Jacobs, A. F. G., 2004. Comparison of dew yields in four Mediterranean sites: similarities and differences. *3th International Conference on Fog, Fog Collection and Dew* (p. E2). University of Pretoria, South Africa.
- Muselli, M., Beysens, D., Marcillat, J., Milimouk, I., Nilsson, T., Louche, A., 2002. Dew water collector for potable water in Ajaccio (Corsica Island, France). *Atmospheric Research*. 64, 297–312.
- Muselli, M., Beysens, D., Mileta, M., Milimouk, I., 2009. Dew and rain water collection in the Dalmatian Coast, Croatia. *Atmospheric Research*. 92, 455-463.
- Muselli, M., Beysens, D., Soyeux, E., Clus, O., 2006. Is dew water potable? Chemical and biological analyses of dew water in Ajaccio (Corsica Island, France). *Journal of Environmental Quality*. 35(5), 1812-1817.
- Muskala, P., Sobik, M., Błaś, M., Polkowska, Ż., Bokwa, A., 2015. Pollutant deposition via dew in urban and rural environment, Cracow, Poland. *Atmospheric Research*. 151, 110-119.

- Nilsson, T. M. J, Vargas, V. E., Niklasson, G. A., Granqvist, C. G., 1994. Condensation of water by radiative cooling. *Renewable Energy*. Vol.5, Part I, 310-317, Elsevier Science.
- Nilsson, T., 1996. Initial experiments on dew collection in Sweden and Tanzania. *Solar Energy Materials and Solar Cells*. 40, 23-32.
- Sharan, G., Beysens, D., Milimouk-Melnytkhouk, I., 2007. A study of dew water yields on Galvanized iron roofs in Kothara (North-West India). *Journal of Arid Environments*. 69, 259 – 269.
- Sharan, G., Clus, O., Singh, S., Muselli, M., Beysens, D., 2011. A very large dew and rain ridge collector in the Kutch Area (Gujarat, India). *Journal of Hydrology*. 405(1), 171-181.
- Sobik, M., Blas, M., Polkowska, Z., 2010, July. Climatology of dew in Poland. 5th International Conference on Fog, Fog Collection and Dew. Münster, Germany.
- Takenaka, N., Soda, H., Sato, K., Terada, H., Suzue, T., Bandow, H., Maeda, Y., 2003. Difference in amounts and composition of dew from different types of dew collectors. *Water, Air, and Soil Pollution*. 147(1-4), 51-60.
- Tomaszkiewicz, M., Abou Najm, M., Zurayk, R., El-Fadel, M., 2017. Dew as an adaptation measure to meet water demand in agriculture and reforestation. *Agricultural and Forest Meteorology*. 232, 411-421.
- Unal, Y., Kindap, T., Karaca, M., 2003. Redefining the climate zones of Turkey using cluster analysis. *International Journal of Climatology: A Journal of the Royal Meteorological Society*. 23(9), 1045-1055.
- Vargas, W.E., Lushiku, E.M., Niklasson, G.A., Nilsson, T.M.J., 1998. Light scattering coatings: Theory and applications. *Solar Energy Materials and Solar Cells*. 54, 343-350.
- Vuollekoski, H., Vogt, M., Sinclair, V. A., Duplissy, J., Järvinen, H., Kyrö, E. Makkonen, R., Petäjä, T., Prisle, N.L., Räisänen, P., Sipilä, M., Ylhäisi, J., Kulmala, M., 2014. Estimates of global dew collection potential. *Hydrology and Earth System Science*. 11, 9519-9549.
- Wagner, G. H., Steele, K. F., & Peden, M. E., 1992. Dew and frost chemistry at a midcontinent site, United States. *Journal of Geophysical Research: Atmospheres*. 97, 20591-20597.
